# Supplementary material for: Sex Differences between Urinary Phthalate Metabolites and Metabolic Syndrome in Adults: A Cross-Sectional Taiwan Biobank Study
Source: MDPI journal article supplement (doi:10.3390/ijerph191610458), 2022-08-22
Supplement: s1 [file s1]

**Supplemental Table S1** Prevalence odds ratios and 95 % confidence intervals for individual MetS components for each quartile of urinary phthalate metabolite.

|                                       |    | high Blood Pressure    |                        |                        | Low HDL Cholesterol    |                      |                        | High Waist Circumference |                        |                        | Hyperglycemia          |                        |                        | Elevated Triglycerides |                        |                        |
|---------------------------------------|----|------------------------|------------------------|------------------------|------------------------|----------------------|------------------------|--------------------------|------------------------|------------------------|------------------------|------------------------|------------------------|------------------------|------------------------|------------------------|
|                                       |    | Overall                | Males                  | Females                | Overall                | Males                | Females                | Overall                  | Males                  | Females                | Overall                | Males                  | Females                | Overall                | Males                  | Females                |
| a with component/ a without component |    | 308/1029               | 212/481                | 96/548                 | 381/956                | 88/605               | 293/351                | 601/736                  | 271/422                | 314/330                | 267/1070               | 140/553                | 127/517                | 313/1024               | 159/534                | 154/490                |
| MEHP                                  | Q1 | Ref                    | Ref                    | Ref                    | Ref                    | Ref                  | Ref                    | Ref                      | Ref                    | Ref                    | Ref                    | Ref                    | Ref                    | Ref                    | Ref                    | Ref                    |
|                                       | Q2 | 0.71 ( 0.45 , 1.12 )   | 0.72 ( 0.45 , 1.16 )   | 0.34 ( 0.04 , 2.78 )   | 1.06 ( 0.59 , 1.90 )   | 0.82 ( 0.43 , 1.56 ) | 3.20 ( 0.53 , 19.23 )  | 0.76 ( 0.50 , 1.14 )     | 0.72 ( 0.46 , 1.11 )   | 0.10 ( 0.74 , 4.56 )   | 0.54 ( 0.33 , 0.88 ) * | 0.54 ( 0.32 , 0.91 ) * | 1.41 ( 0.13 , 14.98 )  | 0.78 ( 0.49 , 1.24 )   | 0.78 ( 0.48 , 1.28 )   | 0.98 ( 0.15 , 6.35 )   |
|                                       | Q3 | 0.85 ( 0.50 , 1.43 )   | 0.99 ( 0.56 , 1.77 )   | 0.43 ( 0.07 , 2.46 )   | 1.17 ( 0.64 , 2.17 )   | 1.20 ( 0.57 , 2.50 ) | 2.64 ( 0.51 , 13.73 )  | 0.84 ( 0.53 , 1.33 )     | 0.79 ( 0.46 , 1.34 )   | 0.07 ( 0.90 , 4.74 ) # | 0.55 ( 0.31 , 0.95 ) * | 0.58 ( 0.30 , 1.11 )   | 1.35 ( 0.16 , 11.71 )  | 0.89 ( 0.53 , 1.47 )   | 0.97 ( 0.54 , 1.74 )   | 1.08 ( 0.20 , 5.66 )   |
|                                       | Q4 | 0.83 ( 0.44 , 1.58 )   | 0.36 ( 0.10 , 1.35 )   | 0.54 ( 0.10 , 3.02 )   | 1.07 ( 0.56 , 2.07 )   | 0.00 ( 0.00 , . )    | 2.73 ( 0.53 , 13.96 )  | 0.62 ( 0.36 , 1.04 ) #   | 0.34 ( 0.11 , 1.07 ) # | 0.15 ( 0.65 , 3.40 )   | 0.88 ( 0.47 , 1.64 )   | 0.49 ( 0.13 , 1.80 )   | 2.22 ( 0.26 , 18.56 )  | 0.76 ( 0.42 , 1.38 )   | 0.32 ( 0.07 , 1.44 )   | 1.00 ( 0.20 , 5.18 )   |
| MEOHP                                 | Q1 | Ref                    | Ref                    | Ref                    | Ref                    | Ref                  | Ref                    | Ref                      | Ref                    | Ref                    | Ref                    | Ref                    | Ref                    | Ref                    | Ref                    | Ref                    |
|                                       | Q2 | 0.92 ( 0.59 , 1.44 )   | 0.94 ( 0.55 , 1.61 )   | 0.87 ( 0.37 , 2.06 )   | 0.88 ( 0.57 , 1.36 )   | 1.18 ( 0.59 , 2.36 ) | 0.74 ( 0.42 , 1.30 )   | 0.92 ( 0.64 , 1.33 )     | 0.91 ( 0.56 , 1.50 )   | 0.89 ( 0.50 , 1.58 )   | 0.76 ( 0.49 , 1.20 )   | 0.69 ( 0.39 , 1.23 )   | 1.00 ( 0.46 , 2.15 )   | 0.90 ( 0.59 , 1.36 )   | 1.20 ( 0.70 , 2.06 )   | 0.61 ( 0.32 , 1.18 )   |
|                                       | Q3 | 1.24 ( 0.79 , 1.95 )   | 1.24 ( 0.70 , 2.18 )   | 1.26 ( 0.58 , 2.76 )   | 0.68 ( 0.44 , 1.06 ) # | 0.55 ( 0.23 , 1.30 ) | 0.66 ( 0.38 , 1.14 )   | 0.93 ( 0.64 , 1.35 )     | 0.91 ( 0.54 , 1.54 )   | 0.84 ( 0.48 , 1.47 )   | 0.88 ( 0.56 , 1.38 )   | 0.45 ( 0.23 , 0.90 ) * | 1.68 ( 0.83 , 3.38 )   | 0.81 ( 0.53 , 1.24 )   | 0.83 ( 0.46 , 1.51 )   | 0.71 ( 0.38 , 1.32 )   |
|                                       | Q4 | 0.73 ( 0.45 , 1.19 )   | 0.67 ( 0.36 , 1.26 )   | 0.80 ( 0.35 , 1.83 )   | 0.71 ( 0.45 , 1.10 )   | 0.88 ( 0.40 , 1.94 ) | 0.60 ( 0.34 , 1.03 ) # | 0.85 ( 0.58 , 1.25 )     | 0.90 ( 0.52 , 1.56 )   | 0.79 ( 0.45 , 1.38 )   | 0.97 ( 0.62 , 1.53 )   | 1.03 ( 0.56 , 1.89 )   | 1.20 ( 0.58 , 2.50 )   | 0.82 ( 0.53 , 1.27 )   | 0.80 ( 0.43 , 1.52 )   | 0.75 ( 0.41 , 1.39 )   |
| MEHHP                                 | Q1 | Ref                    | Ref                    | Ref                    | Ref                    | Ref                  | Ref                    | Ref                      | Ref                    | Ref                    | Ref                    | Ref                    | Ref                    | Ref                    | Ref                    | Ref                    |
|                                       | Q2 | 1.00 ( 0.64 , 1.56 )   | 1.25 ( 0.73 , 2.15 )   | 0.62 ( 0.28 , 1.41 )   | 1.05 ( 0.69 , 1.61 )   | 1.22 ( 0.60 , 2.49 ) | 0.99 ( 0.58 , 1.69 )   | 0.94 ( 0.65 , 1.35 )     | 1.25 ( 0.76 , 2.06 )   | 0.63 ( 0.36 , 1.09 ) # | 0.75 ( 0.48 , 1.16 )   | 0.61 ( 0.34 , 1.09 )   | 0.97 ( 0.49 , 1.93 )   | 1.36 ( 0.91 , 2.03 )   | 1.14 ( 0.66 , 1.96 )   | 1.70 ( 0.93 , 3.12 ) # |
|                                       | Q3 | 0.97 ( 0.61 , 1.54 )   | 0.98 ( 0.54 , 1.80 )   | 0.90 ( 0.43 , 1.85 )   | 0.87 ( 0.57 , 1.32 )   | 0.94 ( 0.42 , 2.09 ) | 0.82 ( 0.49 , 1.35 )   | 0.86 ( 0.60 , 1.24 )     | 0.92 ( 0.53 , 1.59 )   | 0.76 ( 0.46 , 1.27 )   | 0.62 ( 0.39 , 0.99 ) * | 0.48 ( 0.24 , 0.94 ) * | 0.84 ( 0.43 , 1.62 )   | 0.82 ( 0.53 , 1.26 )   | 0.85 ( 0.46 , 1.58 )   | 0.86 ( 0.47 , 1.59 )   |
|                                       | Q4 | 0.95 ( 0.60 , 1.50 )   | 1.04 ( 0.58 , 1.87 )   | 0.77 ( 0.36 , 1.65 )   | 0.84 ( 0.55 , 1.30 )   | 0.78 ( 0.35 , 1.76 ) | 0.83 ( 0.49 , 1.39 )   | 0.93 ( 0.64 , 1.34 )     | 1.08 ( 0.64 , 1.83 )   | 0.75 ( 0.44 , 1.28 )   | 0.98 ( 0.63 , 1.50 )   | 0.77 ( 0.42 , 1.40 )   | 1.42 ( 0.75 , 2.70 )   | 0.87 ( 0.56 , 1.34 )   | 0.81 ( 0.44 , 1.48 )   | 0.94 ( 0.50 , 1.75 )   |
| MECPP                                 | Q1 | Ref                    | Ref                    | Ref                    | Ref                    | Ref                  | Ref                    | Ref                      | Ref                    | Ref                    | Ref                    | Ref                    | Ref                    | Ref                    | Ref                    | Ref                    |
|                                       | Q2 | 0.96 ( 0.61 , 1.50 )   | 0.77 ( 0.45 , 1.33 )   | 1.57 ( 0.67 , 3.67 )   | 1.44 ( 0.92 , 2.26 )   | 1.52 ( 0.77 , 3.00 ) | 1.47 ( 0.81 , 2.66 )   | 0.75 ( 0.51 , 1.09 )     | 0.75 ( 0.46 , 1.23 )   | 0.80 ( 0.44 , 1.47 )   | 0.69 ( 0.43 , 1.10 )   | 0.50 ( 0.27 , 0.93 ) * | 1.18 ( 0.54 , 2.57 )   | 1.27 ( 0.83 , 1.94 )   | 1.07 ( 0.62 , 1.84 )   | 1.93 ( 0.91 , 4.11 ) # |
|                                       | Q3 | 1.05 ( 0.66 , 1.66 )   | 1.25 ( 0.72 , 2.19 )   | 0.95 ( 0.40 , 2.26 )   | 0.93 ( 0.59 , 1.47 )   | 0.57 ( 0.24 , 1.37 ) | 1.09 ( 0.61 , 1.95 )   | 1.15 ( 0.79 , 1.67 )     | 1.16 ( 0.69 , 1.94 )   | 1.26 ( 0.70 , 2.26 )   | 0.78 ( 0.49 , 1.24 )   | 0.52 ( 0.27 , 0.99 ) * | 1.34 ( 0.63 , 2.84 )   | 1.07 ( 0.69 , 1.67 )   | 0.90 ( 0.50 , 1.62 )   | 1.61 ( 0.76 , 3.38 )   |
|                                       | Q4 | 0.74 ( 0.46 , 1.19 )   | 0.68 ( 0.37 , 1.24 )   | 0.87 ( 0.37 , 2.05 )   | 0.98 ( 0.62 , 1.55 )   | 0.84 ( 0.38 , 1.87 ) | 1.06 ( 0.59 , 1.87 )   | 0.83 ( 0.57 , 1.21 )     | 0.70 ( 0.41 , 1.19 )   | 0.96 ( 0.54 , 1.71 )   | 0.96 ( 0.61 , 1.49 )   | 0.99 ( 0.55 , 1.78 )   | 1.28 ( 0.60 , 2.71 )   | 1.15 ( 0.74 , 1.78 )   | 0.85 ( 0.47 , 1.56 )   | 1.88 ( 0.91 , 3.92 ) # |
| MCMHP                                 | Q1 | Ref                    | Ref                    | Ref                    | Ref                    | Ref                  | Ref                    | Ref                      | Ref                    | Ref                    | Ref                    | Ref                    | Ref                    | Ref                    | Ref                    | Ref                    |
|                                       | Q2 | 1.05 ( 0.67 , 1.65 )   | 1.02 ( 0.60 , 1.74 )   | 1.02 ( 0.33 , 3.14 )   | 0.99 ( 0.61 , 1.63 )   | 0.92 ( 0.45 , 1.86 ) | 1.35 ( 0.59 , 3.10 )   | 1.12 ( 0.76 , 1.65 )     | 1.24 ( 0.77 , 2.01 )   | 0.89 ( 0.39 , 2.06 )   | 1.45 ( 0.90 , 2.34 )   | 1.45 ( 0.82 , 2.55 )   | 1.93 ( 0.54 , 6.89 )   | 0.92 ( 0.59 , 1.44 )   | 0.95 ( 0.54 , 1.65 )   | 0.92 ( 0.35 , 2.40 )   |
|                                       | Q3 | 1.04 ( 0.65 , 1.68 )   | 0.89 ( 0.49 , 1.62 )   | 1.08 ( 0.36 , 3.32 )   | 0.91 ( 0.55 , 1.51 )   | 0.65 ( 0.27 , 1.55 ) | 1.32 ( 0.58 , 3.00 )   | 1.39 ( 0.93 , 2.08 )     | 1.71 ( 1.00 , 2.92 ) * | 1.14 ( 0.50 , 2.61 )   | 1.42 ( 0.86 , 2.34 )   | 1.20 ( 0.63 , 2.29 )   | 2.04 ( 0.57 , 7.24 )   | 1.21 ( 0.77 , 1.90 )   | 1.14 ( 0.63 , 2.08 )   | 1.22 ( 0.48 , 3.15 )   |
|                                       | Q4 | 0.88 ( 0.53 , 1.47 )   | 1.28 ( 0.70 , 2.36 )   | 0.53 ( 0.16 , 1.79 )   | 1.12 ( 0.67 , 1.87 )   | 0.99 ( 0.45 , 2.16 ) | 1.57 ( 0.68 , 3.62 )   | 1.15 ( 0.76 , 1.74 )     | 0.96 ( 0.54 , 1.69 )   | 1.05 ( 0.45 , 2.45 )   | 1.72 ( 1.04 , 2.84 ) * | 1.64 ( 0.85 , 3.13 )   | 2.40 ( 0.67 , 8.60 )   | 1.14 ( 0.71 , 1.82 )   | 1.27 ( 0.69 , 2.34 )   | 1.08 ( 0.41 , 2.85 )   |
| MBpP                                  | Q1 | Ref                    | Ref                    | Ref                    | Ref                    | Ref                  | Ref                    | Ref                      | Ref                    | Ref                    | Ref                    | Ref                    | Ref                    | Ref                    | Ref                    | Ref                    |
|                                       | Q2 | 0.80 ( 0.52 , 1.23 )   | 0.67 ( 0.40 , 1.14 )   | 1.22 ( 0.56 , 2.63 )   | 0.73 ( 0.49 , 1.10 )   | 0.67 ( 0.33 , 1.36 ) | 0.71 ( 0.43 , 1.19 )   | 1.04 ( 0.74 , 1.47 )     | 1.12 ( 0.69 , 1.82 )   | 0.96 ( 0.57 , 1.62 )   | 0.56 ( 0.36 , 0.86 )   | 0.61 ( 0.34 , 1.10 ) # | 0.50 ( 0.26 , 0.96 ) * | 0.74 ( 0.50 , 1.09 )   | 0.74 ( 0.44 , 1.26 )   | 0.72 ( 0.40 , 1.29 )   |
|                                       | Q3 | 0.94 ( 0.59 , 1.49 )   | 0.79 ( 0.44 , 1.41 )   | 1.31 ( 0.59 , 2.93 )   | 0.68 ( 0.44 , 1.05 ) # | 0.67 ( 0.31 , 1.46 ) | 0.65 ( 0.38 , 1.11 )   | 1.03 ( 0.71 , 1.49 )     | 1.32 ( 0.78 , 2.22 )   | 0.77 ( 0.45 , 1.34 )   | 0.86 ( 0.56 , 1.33 )   | 0.73 ( 0.39 , 1.37 )   | 0.96 ( 0.51 , 1.80 )   | 0.73 ( 0.48 , 1.12 )   | 0.65 ( 0.36 , 1.19 )   | 0.79 ( 0.43 , 1.45 )   |
|                                       | Q4 | 0.96 ( 0.59 , 1.55 )   | 0.95 ( 0.52 , 1.76 )   | 1.05 ( 0.46 , 2.42 )   | 0.65 ( 0.41 , 1.01 ) # | 0.71 ( 0.31 , 1.64 ) | 0.60 ( 0.35 , 1.04 ) # | 1.09 ( 0.74 , 1.60 )     | 1.16 ( 0.66 , 2.06 )   | 0.95 ( 0.55 , 1.64 )   | 0.60 ( 0.37 , 0.97 ) * | 0.88 ( 0.46 , 1.70 )   | 0.43 ( 0.21 , 0.89 ) * | 0.59 ( 0.37 , 0.92 ) * | 0.71 ( 0.37 , 1.37 )   | 0.50 ( 0.26 , 0.96 ) * |
| MEP                                   | Q1 | Ref                    | Ref                    | Ref                    | Ref                    | Ref                  | Ref                    | Ref                      | Ref                    | Ref                    | Ref                    | Ref                    | Ref                    | Ref                    | Ref                    | Ref                    |
|                                       | Q2 | 0.94 ( 0.58 , 1.52 )   | 0.78 ( 0.43 , 1.39 )   | 1.74 ( 0.66 , 4.58 )   | 0.96 ( 0.60 , 1.53 )   | 1.35 ( 0.60 , 3.04 ) | 0.82 ( 0.46 , 1.47 )   | 0.92 ( 0.62 , 1.35 )     | 0.86 ( 0.51 , 1.47 )   | 1.00 ( 0.55 , 1.79 )   | 1.74 ( 1.06 , 2.85 ) * | 2.23 ( 1.19 , 4.16 ) * | 1.40 ( 0.61 , 3.18 )   | 1.20 ( 0.77 , 1.86 )   | 2.04 ( 1.13 , 3.71 ) * | 0.60 ( 0.31 , 1.17 )   |
|                                       | Q3 | 1.11 ( 0.70 , 1.75 )   | 0.84 ( 0.48 , 1.46 )   | 2.34 ( 0.92 , 5.98 ) # | 1.09 ( 0.69 , 1.72 )   | 1.77 ( 0.83 , 3.78 ) | 0.85 ( 0.48 , 1.52 )   | 1.19 ( 0.81 , 1.73 )     | 0.82 ( 0.49 , 1.37 )   | 1.78 ( 0.98 , 3.21 ) # | 1.35 ( 0.82 , 2.22 )   | 1.22 ( 0.64 , 2.34 )   | 1.55 ( 0.69 , 3.49 )   | 1.07 ( 0.69 , 1.65 )   | 1.46 ( 0.81 , 2.65 )   | 0.69 ( 0.36 , 1.33 )   |
|                                       | Q4 | 0.97 ( 0.61 , 1.54 )   | 0.72 ( 0.41 , 1.28 )   | 2.18 ( 0.85 , 5.56 )   | 1.47 ( 0.94 , 2.30 ) # | 1.17 ( 0.51 , 2.65 ) | 1.64 ( 0.93 , 2.91 ) # | 0.93 ( 0.64 , 1.35 )     | 1.04 ( 0.62 , 1.73 )   | 0.91 ( 0.51 , 1.61 )   | 1.73 ( 1.07 , 2.80 ) * | 1.34 ( 0.70 , 2.56 )   | 2.14 ( 0.98 , 4.67 ) # | 1.08 ( 0.70 , 1.68 )   | 1.07 ( 0.57 , 1.98 )   | 0.89 ( 0.48 , 1.68 )   |
| MBP                                   | Q1 | Ref                    | Ref                    | Ref                    | Ref                    | Ref                  | Ref                    | Ref                      | Ref                    | Ref                    | Ref                    | Ref                    | Ref                    | Ref                    | Ref                    | Ref                    |
|                                       | Q2 | 0.68 ( 0.44 , 1.06 ) # | 0.62 ( 0.35 , 1.08 ) # | 0.82 ( 0.39 , 1.73 )   | 0.75 ( 0.49 , 1.14 )   | 1.02 ( 0.48 , 2.15 ) | 0.64 ( 0.38 , 1.07 ) # | 0.82 ( 0.58 , 1.16 )     | 0.78 ( 0.48 , 1.28 )   | 0.89 ( 0.53 , 1.49 )   | 0.66 ( 0.42 , 1.03 ) # | 0.58 ( 0.31 , 1.10 )   | 0.73 ( 0.38 , 1.42 )   | 0.92 ( 0.61 , 1.38 )   | 1.14 ( 0.66 , 1.98 )   | 0.67 ( 0.37 , 1.23 )   |
|                                       | Q3 | 0.87 ( 0.56 , 1.36 )   | 0.75 ( 0.42 , 1.33 )   | 1.08 ( 0.53 , 2.21 )   | 0.96 ( 0.63 , 1.46 )   | 1.26 ( 0.59 , 2.68 ) | 0.82 ( 0.49 , 1.37 )   | 0.96 ( 0.67 , 1.38 )     | 0.75 ( 0.45 , 1.26 )   | 1.18 ( 0.69 , 2.00 )   | 1.00 ( 0.65 , 1.54 )   | 1.22 ( 0.68 , 2.19 )   | 0.87 ( 0.45 , 1.66 )   | 1.05 ( 0.69 , 1.59 )   | 1.33 ( 0.75 , 2.37 )   | 0.76 ( 0.42 , 1.39 )   |
|                                       | Q4 | 0.85 ( 0.54 , 1.36 )   | 1.06 ( 0.60 , 1.87 )   | 0.54 ( 0.23 , 1.26 )   | 0.89 ( 0.57 , 1.38 )   | 1.33 ( 0.62 , 2.89 ) | 0.72 ( 0.42 , 1.24 )   | 0.57 ( 0.39 , 0.84 ) *   | 0.54 ( 0.31 , 0.93 ) * | 0.63 ( 0.36 , 1.10 )   | 1.00 ( 0.64 , 1.56 )   | 0.85 ( 0.45 , 1.60 )   | 1.21 ( 0.62 , 2.34 )   | 1.01 ( 0.66 , 1.55 )   | 0.87 ( 0.47 , 1.62 )   | 1.06 ( 0.57 , 1.96 )   |

Supplemental Table 1 (continued)

|                                        |    | high Blood Pressure  |                      |                      | Low HDL Cholesterol  |                      |                     | High Waist Circumference |                     |                      | Hyperglycemia        |                      |                       | Elevated Triglycerides |                      |                       |
|----------------------------------------|----|----------------------|----------------------|----------------------|----------------------|----------------------|---------------------|--------------------------|---------------------|----------------------|----------------------|----------------------|-----------------------|------------------------|----------------------|-----------------------|
|                                        |    | Overall              | Males                | Females              | Overall              | Males                | Females             | Overall                  | Males               | Females              | Overall              | Males                | Females               | Overall                | Males                | Females               |
| n with component / n without component |    | 308/1029             | 212/481              | 96/548               | 381/956              | 88/605               | 293/351             | 601/736                  | 271/422             | 314/330              | 267/1070             | 140/553              | 127/517               | 313/1024               | 159/534              | 154/490               |
| MMBP                                   | Q1 | Ref                  | Ref                  | Ref                  | Ref                  | Ref                  | Ref                 | Ref                      | Ref                 | Ref                  | Ref                  | Ref                  | Ref                   | Ref                    | Ref                  | Ref                   |
|                                        | Q2 | 1.57 ( 1.01, 2.42 )* | 1.38 ( 0.80, 2.38 )  | 1.99 ( 0.93, 4.27 )  | 1.11 ( 0.73, 1.69 )  | 1.53 ( 0.68, 3.40 )  | 0.95 ( 0.57, 1.59 ) | 0.93 ( 0.65, 1.33 )      | 1.00 ( 0.61, 1.65 ) | 0.85 ( 0.50, 1.43 )  | 1.13 ( 0.73, 1.74 )  | 1.04 ( 0.57, 1.88 )  | 1.26 ( 0.67, 2.39 )   | 1.25 ( 0.83, 1.90 )    | 1.26 ( 0.70, 2.25 )  | 1.26 ( 0.69, 2.30 )   |
|                                        | Q3 | 1.05 ( 0.65, 1.71 )  | 0.88 ( 0.47, 1.63 )  | 1.35 ( 0.59, 3.08 )  | 1.21 ( 0.78, 1.86 )  | 2.04 ( 0.91, 4.53 )# | 0.93 ( 0.55, 1.57 ) | 0.79 ( 0.54, 1.14 )      | 0.85 ( 0.50, 1.45 ) | 0.72 ( 0.42, 1.22 )  | 1.04 ( 0.66, 1.64 )  | 1.25 ( 0.67, 2.35 )  | 0.97 ( 0.49, 1.92 )   | 1.54 ( 1.01, 2.36 )*   | 1.67 ( 0.92, 3.03 )# | 1.36 ( 0.73, 2.51 )   |
|                                        | Q4 | 1.10 ( 0.69, 1.75 )  | 1.09 ( 0.63, 1.91 )  | 1.13 ( 0.47, 2.71 )  | 1.13 ( 0.73, 1.75 )  | 1.94 ( 0.90, 4.21 )# | 0.86 ( 0.50, 1.48 ) | 0.78 ( 0.54, 1.13 )      | 0.88 ( 0.53, 1.47 ) | 0.72 ( 0.41, 1.25 )  | 0.96 ( 0.61, 1.52 )  | 0.86 ( 0.46, 1.59 )  | 1.15 ( 0.57, 2.30 )   | 1.07 ( 0.69, 1.66 )    | 1.18 ( 0.66, 2.12 )  | 0.96 ( 0.49, 1.88 )   |
| MDP                                    | Q1 | Ref                  | Ref                  | Ref                  | Ref                  | Ref                  | Ref                 | Ref                      | Ref                 | Ref                  | Ref                  | Ref                  | Ref                   | Ref                    | Ref                  | Ref                   |
|                                        | Q2 | 0.85 ( 0.53, 1.36 )  | 0.77 ( 0.44, 1.34 )  | 0.91 ( 0.30, 2.77 )  | 1.01 ( 0.62, 1.67 )  | 1.48 ( 0.71, 3.08 )  | 0.61 ( 0.29, 1.31 ) | 0.93 ( 0.63, 1.38 )      | 0.94 ( 0.57, 1.55 ) | 0.61 ( 0.28, 1.34 )  | 1.12 ( 0.69, 1.83 )  | 1.14 ( 0.63, 2.06 )  | 2.13 ( 0.59, 7.68 )   | 0.89 ( 0.57, 1.39 )    | 1.09 ( 0.62, 1.91 )  | 0.47 ( 0.21, 1.05 )#  |
|                                        | Q3 | 0.92 ( 0.57, 1.49 )  | 0.96 ( 0.55, 1.68 )  | 0.89 ( 0.28, 2.77 )  | 1.17 ( 0.71, 1.93 )  | 1.37 ( 0.64, 2.94 )  | 0.81 ( 0.38, 1.73 ) | 1.00 ( 0.68, 1.48 )      | 1.14 ( 0.69, 1.89 ) | 0.60 ( 0.27, 1.32 )  | 1.43 ( 0.88, 2.32 )  | 1.10 ( 0.60, 2.01 )  | 3.11 ( 0.88, 11.04 )# | 1.00 ( 0.65, 1.56 )    | 1.45 ( 0.84, 2.53 )  | 0.47 ( 0.21, 1.04 )#  |
|                                        | Q4 | 1.25 ( 0.77, 2.04 )  | 1.15 ( 0.63, 2.09 )  | 1.42 ( 0.46, 4.38 )  | 1.02 ( 0.61, 1.73 )  | 1.49 ( 0.66, 3.34 )  | 0.64 ( 0.30, 1.40 ) | 0.98 ( 0.65, 1.49 )      | 1.21 ( 0.70, 2.10 ) | 0.53 ( 0.24, 1.20 )  | 1.42 ( 0.85, 2.37 )  | 1.32 ( 0.69, 2.52 )  | 2.73 ( 0.76, 9.83 )   | 0.75 ( 0.46, 1.21 )    | 0.81 ( 0.42, 1.55 )  | 0.38 ( 0.17, 0.88 )*  |
| MNP                                    | Q1 | Ref                  | Ref                  | Ref                  | Ref                  | Ref                  | Ref                 | Ref                      | Ref                 | Ref                  | Ref                  | Ref                  | Ref                   | Ref                    | Ref                  | Ref                   |
|                                        | Q2 | 0.76 ( 0.35, 1.65 )  | 0.65 ( 0.15, 2.84 )  | 0.90 ( 0.35, 2.29 )  | 1.00 ( 0.54, 1.85 )  | 0.34 ( 0.05, 2.19 )  | 1.15 ( 0.59, 2.22 ) | 0.98 ( 0.55, 1.77 )      | 0.84 ( 0.22, 3.21 ) | 0.98 ( 0.50, 1.90 )  | 0.67 ( 0.32, 1.40 )  | 0.87 ( 0.16, 4.83 )  | 0.64 ( 0.28, 1.50 )   | 1.74 ( 0.85, 3.56 )    | 0.57 ( 0.11, 2.85 )  | 2.20 ( 0.96, 5.01 )#  |
|                                        | Q3 | 0.91 ( 0.33, 2.54 )  | 0.89 ( 0.12, 6.48 )  | 1.03 ( 0.30, 3.51 )  | 1.22 ( 0.53, 2.81 )  | 0.30 ( 0.02, 3.82 )  | 1.44 ( 0.59, 3.51 ) | 0.98 ( 0.45, 2.16 )      | 0.63 ( 0.10, 4.08 ) | 1.01 ( 0.41, 2.48 )  | 0.77 ( 0.29, 2.06 )  | 2.00 ( 0.22, 18.52 ) | 0.62 ( 0.20, 1.96 )   | 3.68 ( 1.45, 9.35 )*   | 0.75 ( 0.08, 6.95 )  | 5.05 ( 1.75, 14.58 )* |
|                                        | Q4 | 0.97 ( 0.25, 3.77 )  | 1.00 ( 0.07, 15.07 ) | 1.11 ( 0.22, 5.52 )  | 1.44 ( 0.47, 4.35 )  | 0.12 ( 0.00, 4.74 )  | 1.90 ( 0.58, 6.20 ) | 1.10 ( 0.38, 3.17 )      | 0.60 ( 0.05, 7.92 ) | 1.18 ( 0.36, 3.86 )  | 0.71 ( 0.19, 2.66 )  | 1.81 ( 0.09, 36.90 ) | 0.55 ( 0.12, 2.61 )   | 2.80 ( 0.81, 9.70 )    | 0.33 ( 0.01, 7.52 )  | 4.14 ( 1.03, 16.69 )* |
| ΣHNP                                   | Q1 | Ref                  | Ref                  | Ref                  | Ref                  | Ref                  | Ref                 | Ref                      | Ref                 | Ref                  | Ref                  | Ref                  | Ref                   | Ref                    | Ref                  | Ref                   |
|                                        | Q2 | 1.14 ( 0.72, 1.80 )  | 1.07 ( 0.65, 1.78 )  | 2.54 ( 0.52, 12.39 ) | 0.98 ( 0.59, 1.63 )  | 1.00 ( 0.52, 1.92 )  | 0.89 ( 0.36, 2.17 ) | 0.93 ( 0.63, 1.38 )      | 0.81 ( 0.51, 1.29 ) | 1.76 ( 0.71, 4.38 )  | 0.54 ( 0.33, 0.88 )* | 0.47 ( 0.26, 0.85 )* | 0.86 ( 0.28, 2.65 )   | 1.00 ( 0.65, 1.55 )    | 0.99 ( 0.59, 1.65 )  | 1.09 ( 0.40, 2.95 )   |
|                                        | Q3 | 1.16 ( 0.71, 1.87 )  | 1.15 ( 0.65, 2.05 )  | 2.36 ( 0.50, 11.09 ) | 0.72 ( 0.43, 1.22 )  | 0.53 ( 0.22, 1.28 )  | 0.72 ( 0.31, 1.69 ) | 1.01 ( 0.67, 1.52 )      | 0.95 ( 0.56, 1.61 ) | 1.71 ( 0.71, 4.10 )  | 0.55 ( 0.33, 0.91 )* | 0.49 ( 0.25, 0.97 )* | 0.77 ( 0.26, 2.28 )   | 0.76 ( 0.48, 1.21 )    | 0.82 ( 0.45, 1.50 )  | 0.77 ( 0.29, 2.02 )   |
|                                        | Q4 | 0.81 ( 0.48, 1.38 )  | 0.60 ( 0.29, 1.25 )  | 1.94 ( 0.41, 9.10 )  | 0.72 ( 0.43, 1.23 )  | 0.83 ( 0.34, 2.04 )  | 0.68 ( 0.29, 1.59 ) | 0.85 ( 0.56, 1.30 )      | 0.77 ( 0.42, 1.43 ) | 1.43 ( 0.60, 3.40 )  | 0.92 ( 0.56, 1.50 )  | 1.07 ( 0.55, 2.08 )  | 1.14 ( 0.40, 3.27 )   | 0.78 ( 0.48, 1.27 )    | 0.74 ( 0.36, 1.52 )  | 0.84 ( 0.32, 2.18 )   |
| ΣLMNP                                  | Q1 | Ref                  | Ref                  | Ref                  | Ref                  | Ref                  | Ref                 | Ref                      | Ref                 | Ref                  | Ref                  | Ref                  | Ref                   | Ref                    | Ref                  | Ref                   |
|                                        | Q2 | 1.22 ( 0.78, 1.92 )  | 1.07 ( 0.60, 1.88 )  | 1.60 ( 0.72, 3.56 )  | 1.37 ( 0.88, 2.11 )  | 1.52 ( 0.70, 3.28 )  | 1.26 ( 0.74, 2.14 ) | 0.85 ( 0.59, 1.22 )      | 0.90 ( 0.54, 1.51 ) | 0.75 ( 0.44, 1.28 )  | 1.23 ( 0.79, 1.92 )  | 1.36 ( 0.75, 2.48 )  | 1.24 ( 0.62, 2.45 )   | 1.24 ( 0.82, 1.89 )    | 1.71 ( 0.97, 3.02 )# | 0.89 ( 0.48, 1.65 )   |
|                                        | Q3 | 1.11 ( 0.70, 1.77 )  | 0.99 ( 0.56, 1.77 )  | 1.41 ( 0.62, 3.21 )  | 1.28 ( 0.83, 2.00 )  | 1.20 ( 0.53, 2.69 )  | 1.30 ( 0.76, 2.23 ) | 0.94 ( 0.65, 1.36 )      | 0.88 ( 0.52, 1.49 ) | 0.94 ( 0.54, 1.63 )  | 0.94 ( 0.59, 1.50 )  | 0.87 ( 0.45, 1.67 )  | 1.08 ( 0.53, 2.18 )   | 1.06 ( 0.69, 1.63 )    | 1.23 ( 0.68, 2.23 )  | 0.86 ( 0.45, 1.61 )   |
|                                        | Q4 | 0.98 ( 0.62, 1.55 )  | 0.89 ( 0.51, 1.55 )  | 1.20 ( 0.51, 2.80 )  | 1.48 ( 0.96, 2.29 )# | 1.63 ( 0.77, 3.44 )  | 1.44 ( 0.84, 2.47 ) | 0.71 ( 0.50, 1.03 )#     | 0.86 ( 0.52, 1.43 ) | 0.58 ( 0.34, 1.01 )# | 1.19 ( 0.76, 1.85 )  | 1.02 ( 0.56, 1.86 )  | 1.47 ( 0.74, 2.91 )   | 1.03 ( 0.68, 1.58 )    | 0.84 ( 0.46, 1.54 )  | 1.16 ( 0.63, 2.15 )   |
| ΣDEHP                                  | Q1 | Ref                  | Ref                  | Ref                  | Ref                  | Ref                  | Ref                 | Ref                      | Ref                 | Ref                  | Ref                  | Ref                  | Ref                   | Ref                    | Ref                  | Ref                   |
|                                        | Q2 | 0.90 ( 0.57, 1.43 )  | 0.84 ( 0.49, 1.42 )  | 1.47 ( 0.44, 4.89 )  | 0.82 ( 0.50, 1.34 )  | 0.83 ( 0.42, 1.66 )  | 0.82 ( 0.37, 1.80 ) | 0.90 ( 0.61, 1.33 )      | 0.89 ( 0.55, 1.43 ) | 1.23 ( 0.55, 2.73 )  | 0.81 ( 0.51, 1.30 )  | 0.67 ( 0.37, 1.20 )  | 1.77 ( 0.56, 5.63 )   | 1.11 ( 0.72, 1.72 )    | 1.25 ( 0.74, 2.11 )  | 1.05 ( 0.42, 2.64 )   |
|                                        | Q3 | 1.25 ( 0.79, 1.98 )  | 1.27 ( 0.74, 2.19 )  | 1.81 ( 0.57, 5.79 )  | 0.74 ( 0.45, 1.21 )  | 0.56 ( 0.25, 1.25 )  | 0.79 ( 0.37, 1.70 ) | 1.06 ( 0.72, 1.57 )      | 0.89 ( 0.53, 1.48 ) | 1.67 ( 0.76, 3.65 )  | 0.71 ( 0.43, 1.15 )  | 0.54 ( 0.28, 1.04 )# | 1.52 ( 0.49, 4.76 )   | 0.96 ( 0.61, 1.50 )    | 0.88 ( 0.49, 1.58 )  | 1.13 ( 0.46, 2.76 )   |
|                                        | Q4 | 0.69 ( 0.41, 1.15 )  | 0.60 ( 0.30, 1.20 )  | 1.05 ( 0.32, 3.42 )  | 0.66 ( 0.40, 1.09 )  | 0.68 ( 0.29, 1.60 )  | 0.67 ( 0.32, 1.44 ) | 0.86 ( 0.57, 1.30 )      | 0.78 ( 0.44, 1.40 ) | 1.21 ( 0.56, 2.61 )  | 1.11 ( 0.69, 1.80 )  | 1.15 ( 0.61, 2.19 )  | 2.04 ( 0.67, 6.23 )   | 0.88 ( 0.55, 1.42 )    | 0.78 ( 0.39, 1.54 )  | 1.00 ( 0.42, 2.43 )   |
| ΣDBP                                   | Q1 | Ref                  | Ref                  | Ref                  | Ref                  | Ref                  | Ref                 | Ref                      | Ref                 | Ref                  | Ref                  | Ref                  | Ref                   | Ref                    | Ref                  | Ref                   |
|                                        | Q2 | 0.94 ( 0.60, 1.47 )  | 0.83 ( 0.47, 1.47 )  | 1.06 ( 0.51, 2.21 )  | 1.21 ( 0.80, 1.84 )  | 2.11 ( 0.95, 4.69 )# | 0.93 ( 0.56, 1.54 ) | 1.01 ( 0.71, 1.43 )      | 0.90 ( 0.55, 1.50 ) | 1.06 ( 0.63, 1.79 )  | 1.05 ( 0.68, 1.62 )  | 0.94 ( 0.51, 1.73 )  | 1.20 ( 0.64, 2.28 )   | 1.32 ( 0.87, 1.99 )    | 1.88 ( 1.06, 3.34 )* | 0.89 ( 0.49, 1.64 )   |
|                                        | Q3 | 1.14 ( 0.73, 1.78 )  | 1.21 ( 0.69, 2.13 )  | 1.05 ( 0.49, 2.23 )  | 1.29 ( 0.84, 1.98 )  | 2.12 ( 0.93, 4.83 )# | 1.02 ( 0.60, 1.72 ) | 0.74 ( 0.51, 1.06 )      | 0.93 ( 0.55, 1.57 ) | 0.62 ( 0.36, 1.06 )# | 1.01 ( 0.65, 1.58 )  | 1.13 ( 0.62, 2.07 )  | 0.98 ( 0.50, 1.93 )   | 1.28 ( 0.83, 1.95 )    | 1.34 ( 0.73, 2.47 )  | 1.06 ( 0.58, 1.95 )   |
|                                        | Q4 | 0.85 ( 0.53, 1.35 )  | 0.96 ( 0.55, 1.67 )  | 0.62 ( 0.26, 1.48 )  | 1.28 ( 0.82, 1.99 )  | 2.31 ( 1.05, 5.08 )* | 0.94 ( 0.54, 1.64 ) | 0.77 ( 0.53, 1.12 )      | 0.74 ( 0.44, 1.23 ) | 0.82 ( 0.47, 1.44 )  | 0.89 ( 0.56, 1.41 )  | 0.78 ( 0.42, 1.44 )  | 1.12 ( 0.55, 2.26 )   | 1.27 ( 0.82, 1.95 )    | 1.39 ( 0.77, 2.50 )  | 1.11 ( 0.59, 2.12 )   |

Abbreviations: MEHP (Mono-ethylhexyl phthalate); MEOHP (Mono-2-ethyl-5-oxohexyl phthalate); MEHHP (Mono-2-ethyl-5-hydroxyhexyl phthalate); MECPP (methylerythritol cyclodiphosphate); MCMHP (Mono(2-carboxymethylhexyl) phthalate); MBzP (monobenzyl phthalate); MEP (monoethyl phthalate); MiBP (monoisobutyl phthalate); MnBP (mono-n-butyl phthalate); MMP (Mono-methyl phthalate); MiNP (Mono-isooctyl phthalate);  $\Sigma$ HMW (high molecular weight) = (Mono-ethylhexyl phthalate (MEHP) + Mono-2-ethyl-5-oxohexyl phthalate (MEOHP) + Mono-2-ethyl-5-hydroxyhexyl phthalate (MEHHP) + Mono-benzyl phthalate (MBzP) + Mono-isooctyl phthalate (MiNP).  $\Sigma$ LMW (low molecular weight) = Mono-ethyl phthalate (MEP) + Mono-isobutyl phthalate (MiBP) + Mono-n-butyl phthalate (MnBP) + Mono-methyl phthalate (MMP).  $\Sigma$ DEHP (di(2-ethylhexyl) phthalate [molar sum of mono-(2-ethylhexyl) phthalate (MEHP), mono-(2-ethyl-5oxohexyl) phthalate (MEOHP), and mono-(2-ethyl-5-hydroxyhexyl) phthalate (MEHHP), and mono-(2-ethyl-5-carboxypentyl) phthalate (MECPP) , and Mono(2-carboxymethylhexyl) phthalate (MCMHP)].  $\Sigma$ DBP (dibutyl phthalate) = Mono-isobutyl phthalate (MiBP) + Mono-n-butyl phthalate (MnBP).

#  $P < 0.10$  \* $P < 0.05$ .

Adjusted for urinary creatinine, age, sex, education, and working status.

**Supplemental Table 2** Prevalence odds ratios for the association between urinary metabolites concentrations and metabolic syndrome stratified by menopausal status in females.

| Phthalate   |                       | Females (n=644)            |                        |                |  |
|-------------|-----------------------|----------------------------|------------------------|----------------|--|
| Metabolites | premenopausal (n=354) |                            | postmenopausal (n=290) |                |  |
| MEOHP       |                       |                            |                        |                |  |
| Q1          | Ref                   |                            | Ref                    |                |  |
| Q2          | 0.35                  | (0.12, 1.06) <sup>#</sup>  | 1.06                   | (0.38, 2.96)   |  |
| Q3          | 0.73                  | (0.29, 1.86)               | 1.49                   | (0.58, 3.86)   |  |
| Q4          | 0.48                  | (0.18, 1.29)               | 0.60                   | (0.21, 1.72)   |  |
| MEHHP       |                       |                            |                        |                |  |
| Q1          | Ref                   |                            | Ref                    |                |  |
| Q2          | 0.51                  | (0.18, 1.42)               | 2.09                   | (0.80, 5.50)   |  |
| Q3          | 0.45                  | (0.17, 1.16) <sup>#</sup>  | 1.34                   | (0.52, 3.46)   |  |
| Q4          | 0.82                  | (0.32, 2.06)               | 1.05                   | (0.39, 2.79)   |  |
| MBzP        |                       |                            |                        |                |  |
| Q1          | Ref                   |                            | Ref                    |                |  |
| Q2          | 0.09                  | (0.02, 0.39)*              | 1.28                   | (0.52, 3.13)   |  |
| Q3          | 0.47                  | (0.19, 1.13) <sup>#</sup>  | 1.53                   | (0.58, 4.05)   |  |
| Q4          | 0.43                  | (0.17, 1.09) <sup>#</sup>  | 0.78                   | (0.27, 2.23)   |  |
| MiNP        |                       |                            |                        |                |  |
| Q1          | Ref                   |                            | Ref                    |                |  |
| Q2          | 2.44                  | (0.65, 9.25)               | 1.58                   | (0.47, 5.38)   |  |
| Q3          | 4.10                  | (0.78, 21.65) <sup>#</sup> | 1.90                   | (0.36, 10.05)  |  |
| Q4          | 4.11                  | (0.50 34.06)               | 1.92                   | (0.20, 18.39)  |  |
| ΣDEHP       |                       |                            |                        |                |  |
| Q1          | Ref                   |                            | Ref                    |                |  |
| Q2          | 0.71                  | (0.17, 2.88)               | 4.67                   | (0.55, 40.10)  |  |
| Q3          | 0.49                  | (0.12, 1.96)               | 9.58                   | (1.18, 77.75)* |  |
| Q4          | 0.63                  | (0.16, 2.43)               | 5.06                   | (0.62, 41.34)  |  |

Abbreviations: MEOHP (Mono-2-ethyl-5-oxohexyl phthalate); MEHHP (Mono-2-ethyl-5-hydroxylhexyl phthalate); MBzP (monobenzyl phthalate); MiNP (Mono-isooctyl phthalate); ΣDEHP (di(2-ethylhexyl) phthalate [molar sum of mono-(2-ethylhexyl) phthalate (MEHP), mono-(2-ethyl-5oxohexyl) phthalate (MEOHP), and mono-(2-ethyl-5-hydroxyhexyl) phthalate (MEHHP), and mono-(2-ethyl-5-carboxypentyl) phthalate (MECPP) , and Mono(2-carboxymethylhexyl) phthalate (MCMHP)]).

<sup>#</sup>P < 0.10 \*P < 0.05.

Adjusted for urinary creatinine, age, education, and working status
